# Supplementary material for: Molecular Weight-Dependent Physical and Photovoltaic Properties of Poly(3-alkylthiophene)s with Butyl, Hexyl, and Octyl Side-Chains
Source: MDPI journal article supplement (doi:10.3390/polym13193440), 2021-10-07
Supplement: s1 [file s1]

## Supporting Information

### Molecular Weight-Dependent Physical and Photovoltaic Properties of Poly(3-alkylthiophene)s with Butyl, Hexyl, and Octyl Side-Chains

Thanh-Danh Nguyen<sup>1,2</sup>, Van Hai Nguyen<sup>1</sup>, Jongwoo Song<sup>1</sup>, Jongdeok An<sup>1</sup>, Ngoc-Thuan Truong<sup>1</sup>, Chi-Hien Dang<sup>2</sup>, and Chan Im<sup>1,\*</sup>

<sup>1</sup>Dept. of Chemistry, Konkuk University, 120 Neungdong-ro, Gwangjin-gu, Seoul 05029, Korea

<sup>2</sup>Institute of Chemical Technology, Vietnam Academy of Science and Technology, 1A TL29 street, Thanh Loc Ward, District 5, Ho Chi Minh City, Vietnam.

\*Email: chanim@konkuk.ac.kr

Fax: +82-2-2201-0407

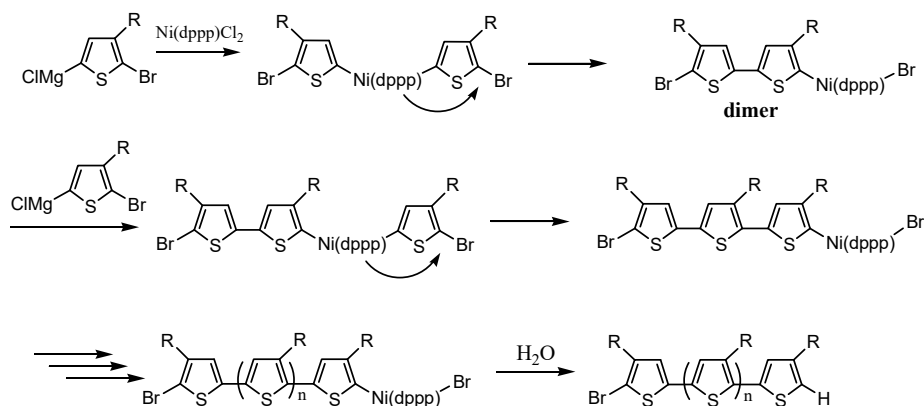

**Scheme S1.** Proposed living chain growth mechanism for the synthesis of rr-P3ATs by GRIM polymerization.

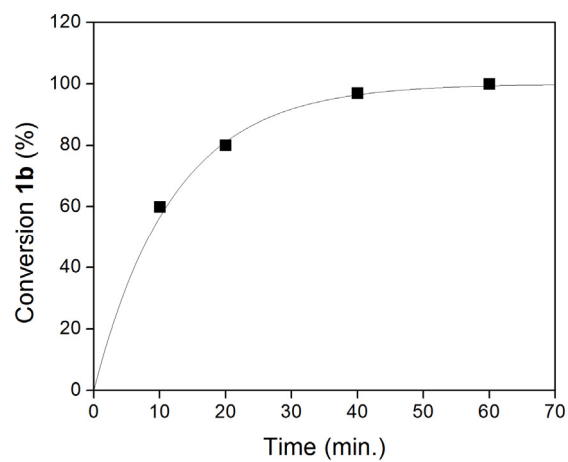

**Figure S1.** Conversion of 2-Bromo-3-hexyl-5-iodothiophene (**1b**) versus Grignard-exchanged reaction time.

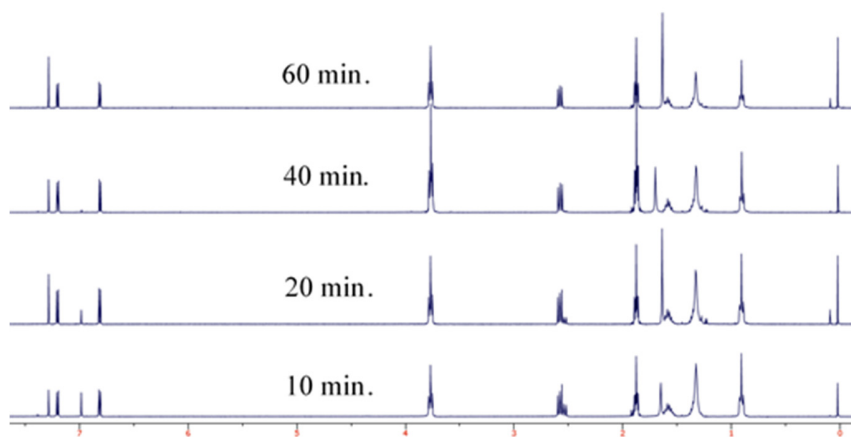

**Figure S2.** NMR spectra of 2-Bromo-3-hexyl-5-iodothiophene (**1b**) quenching with water at different time intervals.

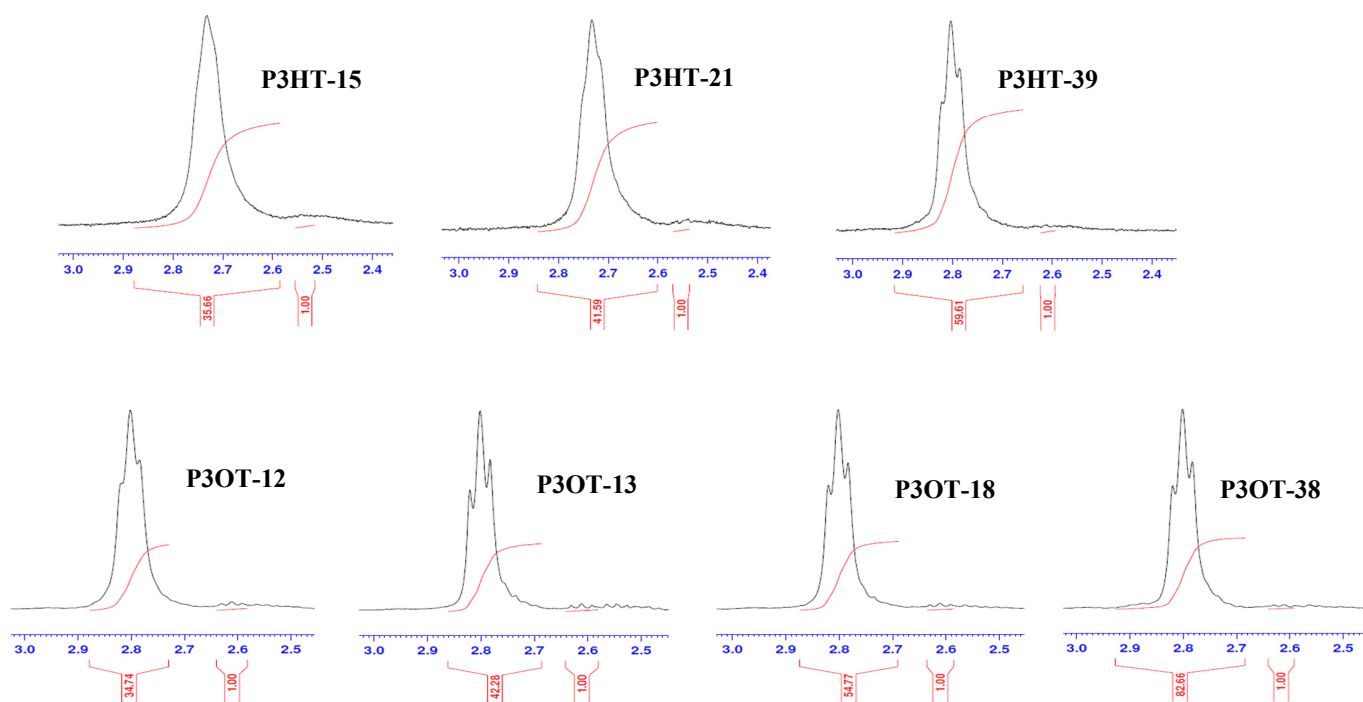

**Figure S3.**  $^1\text{H}$ -NMR used to calculate  $M_n$  of P3HTs and P3OTs.

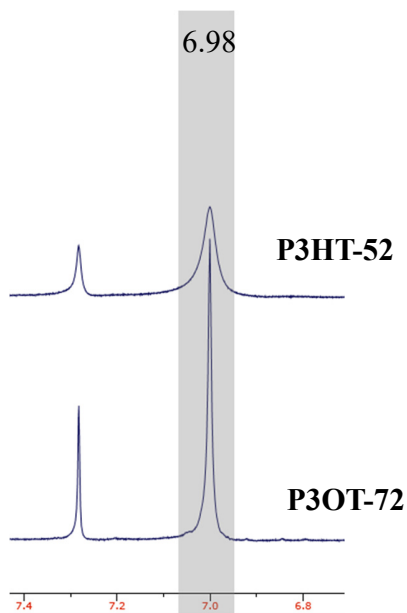

**Figure S4.** NMR spectra of P3HT and P3OT for calculated RR.

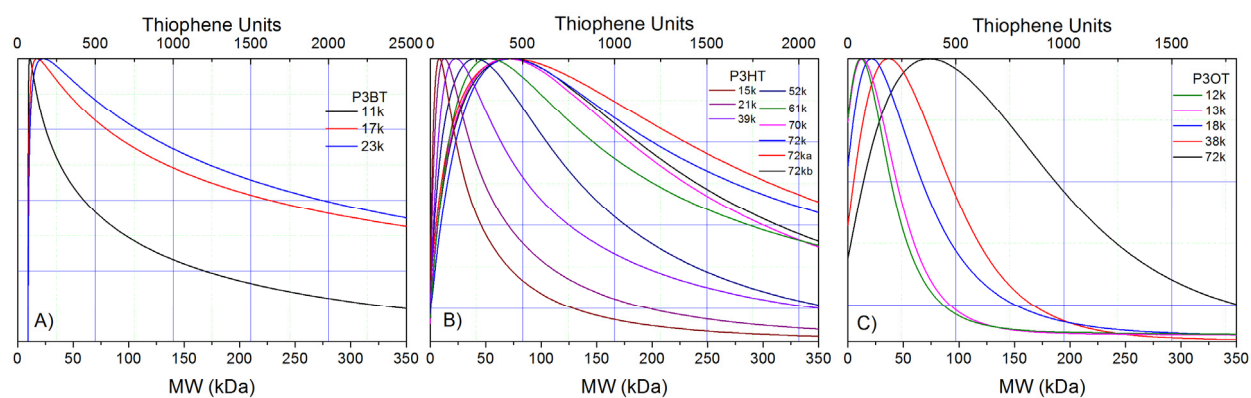

**Figure S5.** Normalized GPC curves of P3ATs.

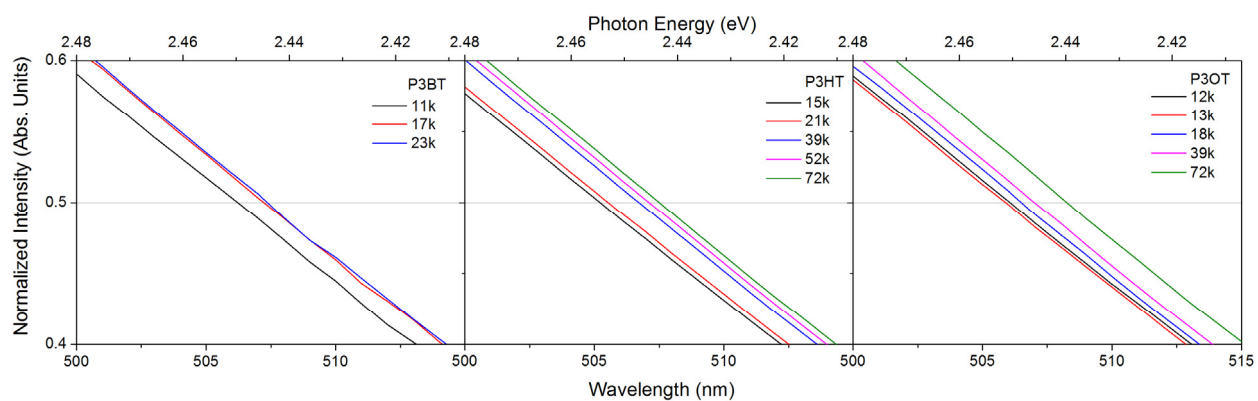

**Figure S6.** UV-Vis magnification of P3ATs.

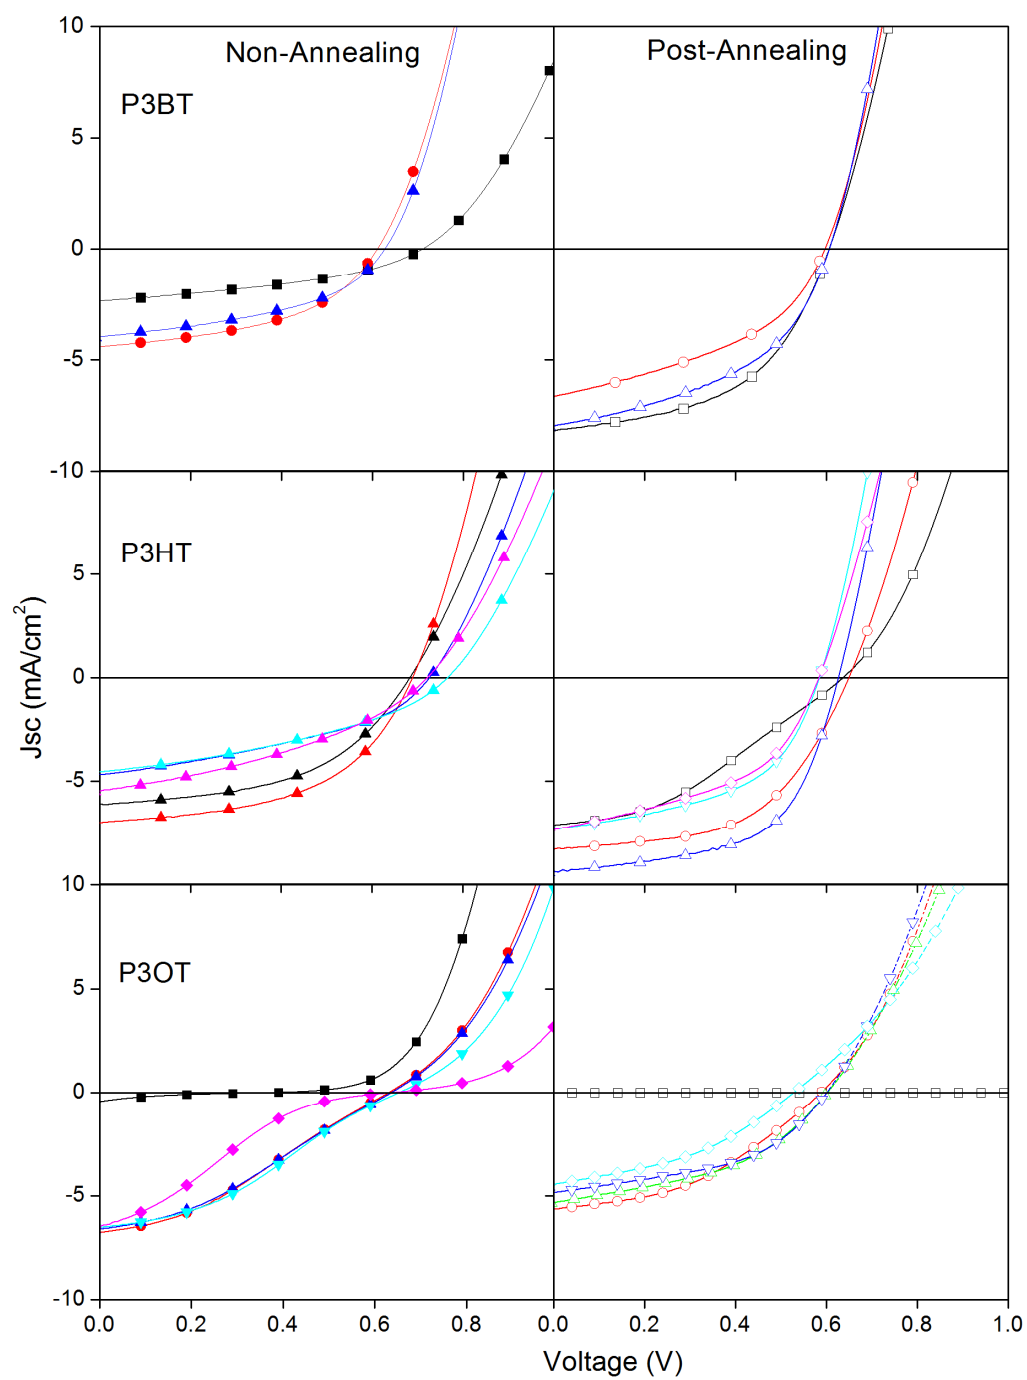

**Figure S7.** J-V characteristics of all P3ATs before annealing (solid symbols) and after annealing (open symbols).

**Table S1.** Solubility of P3ATs in common organic solvents.

| P3AT     | Hexane          | CH <sub>2</sub> Cl <sub>2</sub> | THF            | CHCl <sub>3</sub> | Toluene        | CB             | ODCB           |
|----------|-----------------|---------------------------------|----------------|-------------------|----------------|----------------|----------------|
| P3HT-15  | MS <sup>a</sup> | MS <sup>a</sup>                 | S              | S                 | S              | S              | S              |
| P3HT-21  | I               | MS <sup>a</sup>                 | S              | S                 | S              | S              | S              |
| P3HT-39  | I               | MS <sup>a</sup>                 | S <sup>a</sup> | S <sup>a</sup>    | S              | S              | S              |
| P3HT-52  | I               | I                               | S <sup>a</sup> | S <sup>a</sup>    | S              | S              | S              |
| P3HT-61  | I               | I                               | S <sup>a</sup> | S <sup>a</sup>    | S <sup>a</sup> | S <sup>a</sup> | S <sup>a</sup> |
| P3HT-70  | I               | I                               | S <sup>a</sup> | S <sup>a</sup>    | S <sup>a</sup> | S <sup>a</sup> | S <sup>a</sup> |
| P3HT-72a | I               | I                               | S <sup>a</sup> | S <sup>a</sup>    | S <sup>a</sup> | S <sup>a</sup> | S <sup>a</sup> |
| P3OT-12  | MS <sup>a</sup> | S <sup>a</sup>                  | S              | S                 | S              | S              | S              |
| P3OT-13  | MS <sup>a</sup> | S <sup>a</sup>                  | S              | S                 | S              | S              | S              |
| P3OT-18  | MS <sup>a</sup> | MS <sup>a</sup>                 | S              | S                 | S              | S              | S              |
| P3OT-38  | I               | MS <sup>a</sup>                 | S              | S                 | S              | S              | S              |
| P3OT-72  | I               | MS <sup>a</sup>                 | S              | S                 | S              | S              | S              |

S: soluble, I: insoluble, MS: marginally soluble, a: only possible in hot solvents.

**Table S2.** Thermal properties and crystallinity of P3ATs.

| P3ATs    | T <sub>m</sub> (°C) | T <sub>c</sub> (°C) | ΔH <sub>f</sub> (J/g) | X (%) |
|----------|---------------------|---------------------|-----------------------|-------|
| P3BT-11  | 245                 | 165                 | 21.7                  | -     |
| P3BT-17  | 250                 | 170                 | 19.8                  | -     |
| P3BT-23  | 249                 | 168                 | 25.2                  | -     |
| P3HT-15  | 212                 | 174                 | 3.2                   | 3.2   |
| P3HT-21  | 220                 | 159                 | 4.2                   | 4.2   |
| P3HT-39  | 219                 | 182                 | 8.6                   | 8.7   |
| P3HT-52  | 225                 | 189                 | 16.4                  | 16.6  |
| P3HT-72a | 225                 | 180                 | 12.1                  | 12.2  |
| P3OT-12  | 173, 184            | 145                 | 11.2                  | 14.5  |
| P3OT-13  | 183, 189            | 155                 | 17.5                  | 22.7  |
| P3OT-18  | 186, 191            | 162                 | 14.1                  | 18.3  |
| P3OT-38  | 194                 | 165                 | 17.6                  | 22.9  |
| P3OT-72  | 198                 | 162                 | 19.7                  | 25.6  |

**Table S3.** Overview of P3ATs' device parameters.

| P3ATs    | V <sub>oc</sub> |      | J <sub>sc</sub>       |     | FF   |      | PCE |     |
|----------|-----------------|------|-----------------------|-----|------|------|-----|-----|
|          | (V)             |      | (mA/cm <sup>2</sup> ) |     | (%)  |      | (%) |     |
|          | NA              | PA   | NA                    | PA  | NA   | PA   | NA  | PA  |
| P3BT-11  | 0.70            | 0.60 | 2.6                   | 8.2 | 41.6 | 51.3 | 0.8 | 2.4 |
| P3BT-17  | 0.62            | 0.60 | 4.9                   | 7.8 | 47.3 | 42.8 | 1.5 | 2.0 |
| P3BT-23  | 0.63            | 0.61 | 4.4                   | 7.7 | 46.4 | 45.4 | 1.3 | 2.0 |
| P3HT-15  | 0.69            | 0.65 | 7.1                   | 7.9 | 53.0 | 40.0 | 2.4 | 2.0 |
| P3HT-21  | 0.69            | 0.65 | 7.1                   | 8.9 | 51.8 | 56.1 | 2.6 | 3.3 |
| P3HT-39  | 0.74            | 0.63 | 5.0                   | 9.5 | 44.0 | 61.3 | 1.4 | 3.6 |
| P3HT-52  | 0.77            | 0.61 | 5.3                   | 9.7 | 40.9 | 56.4 | 1.5 | 3.4 |
| P3HT-72a | 0.72            | 0.60 | 5.2                   | 8.2 | 38.0 | 47.0 | 1.6 | 2.3 |
| P3OT-13  | 0.63            | 0.57 | 7.0                   | 5.5 | 32.4 | 41.3 | 1.4 | 1.4 |
| P3OT-18  | 0.63            | 0.58 | 6.7                   | 4.7 | 33.7 | 40.5 | 1.4 | 1.3 |
| P3OT-38  | 0.65            | 0.60 | 6.7                   | 5.3 | 35.9 | 46.6 | 1.6 | 1.5 |
| P3OT-52  | 0.53            | 0.64 | 4.5                   | 6.5 | 39.5 | 22.8 | 0.9 | 0.9 |

NA: non-annealed, PA: post-annealed.
